# Supplementary material for: Site-directed M2 proton channel inhibitors enable synergistic combination therapy for rimantadine-resistant pandemic influenza
Source: PubMed Central journal article supplement (PMC7418971; doi:10.1371/journal.ppat.1008716), 2020-08-11
Supplement: ppat.1008716.s009.pdf [file ppat.1008716.s009.pdf]

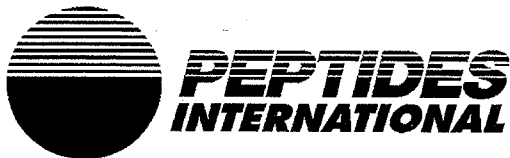

11621 Electron Drive  
Louisville, Kentucky 40299 USA  
Phone: 502-266-8787  
Fax: 502-267-1FAX (1329)  
peptides@pepnet.com  
PEPNET.COM

## ANALYTICAL DATA SHEET

Product Name: **H-RCSDSSDPLVIAASIIGILHLILWITDRLFFKCIYRRFKY  
GLK-NH<sub>2</sub>**  
H-Arg-Cys-Ser-Asp-Ser-Ser-Asp-Pro-Leu-Val-Ile-Ala-Ala-  
Ser-Ile-Ile-Gly-Ile-Leu-His-Leu-Ile-Leu-Trp-Ile-Thr-Asp-Arg-  
Leu-Phe-Phe-Lys-Cys-Ile-Tyr-Arg-Arg-Phe-Lys-Tyr-Gly-Leu-  
Lys-NH<sub>2</sub>

|             |                                                                                  |                  |         |
|-------------|----------------------------------------------------------------------------------|------------------|---------|
| Catalog No. | PCS-30083-PI                                                                     | Lot No.          | 919371  |
| Formula     | C <sub>236</sub> H <sub>376</sub> N <sub>62</sub> O <sub>56</sub> S <sub>2</sub> | Molecular Weight | 5042.14 |

Appearance White powder

ES-MS MW Calculated 5038.79 MW Found 5038.13

### Amino Acid Analysis

|     |          |
|-----|----------|
| Asp | 2.32 (3) |
| Ser | 3.09 (4) |
| Gly | 1.92 (2) |
| His | 0.87 (1) |
| Arg | 4.37 (4) |
| Thr | 0.95 (1) |
| Ala | 2.00 (2) |
| Pro | 1.01 (1) |
| Tyr | 1.90 (2) |
| Val | 0.93 (1) |
| Lys | 2.77 (3) |
| Ile | 6.76 (7) |
| Leu | 6.26 (6) |
| Phe | 3.25 (3) |

Form Trifluoroacetate Salt

HPLC profile included (purity 93.6%)

---

Prepared by  
Original Date: December 7, 2009  
Idc  
Revised Date: December 22, 2009  
Idc

---

Approved by

### Sample Information

Acquired by : Admin  
 Sample Name : PCS-30083-PI  
 Sample ID : 919371  
 Description : 32mg in 10uL AcOH + 60uL MeCN/TFA/H2O degassed

Vial# :  
 Injection Volume : 5 uL  
 Data Filename : 919371R.lcd  
 Method Filename : gradient 20\_70.lcm  
 Batch Filename :  
 Report Filename : reportformat20\_70.lcr  
 Date Acquired : 12/7/2009 10:29:34 AM  
 Data Processed : 12/7/2009 11:35:37 AM

Gradient: 20-70% in 50 min.

Column: Vydac C18, 218TP54, (4.6mm i.d., 250 mm L)

Buffer: A: 0.05% TFA in H2O

B: 0.05% TFA in MeCN

Flow: 1mL/min

mAU

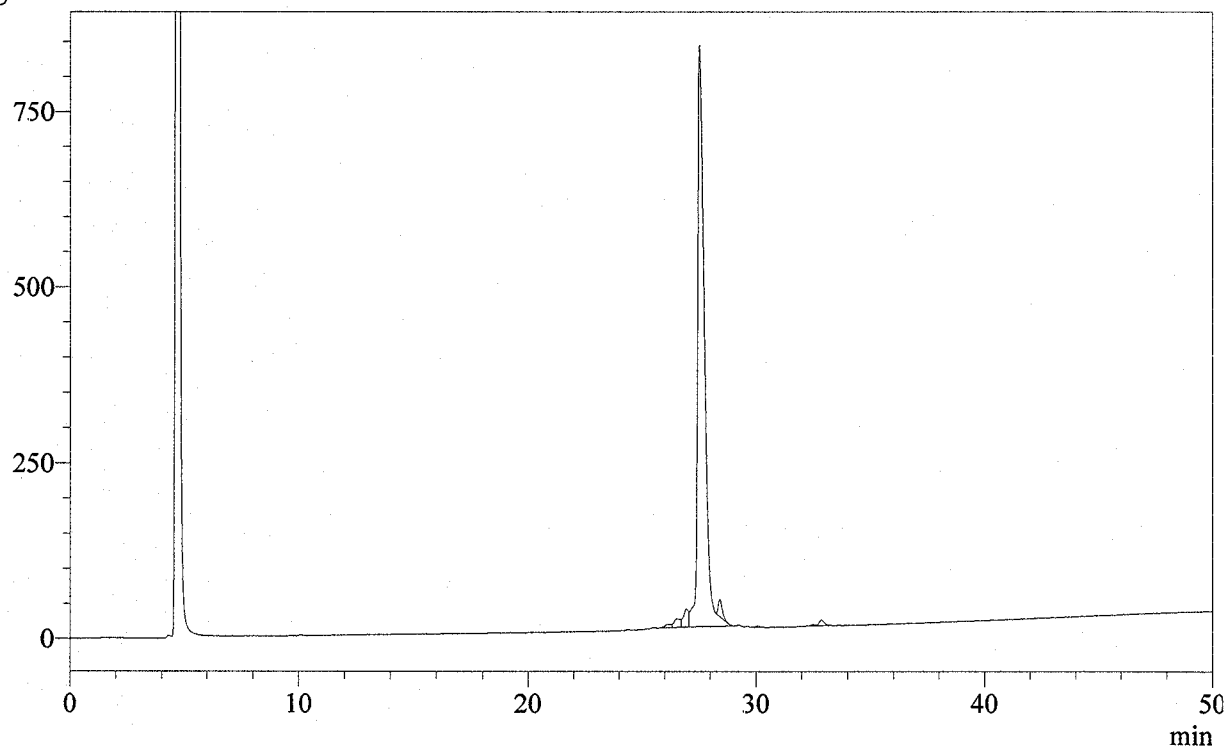

1 Det.A Ch1 / 220nm

### PeakTable

Detector A Ch1 220nm

| Ret. Time | Area     | Height | Area %  |
|-----------|----------|--------|---------|
| 26.108    | 90296    | 4716   | 0.485   |
| 26.517    | 251569   | 12012  | 1.350   |
| 26.953    | 397518   | 26277  | 2.133   |
| 27.530    | 17433096 | 827853 | 93.557  |
| 28.414    | 300037   | 24235  | 1.610   |
| 30.082    | 21396    | 1973   | 0.115   |
| 32.475    | 22670    | 1562   | 0.122   |
| 32.863    | 117145   | 7889   | 0.629   |
|           |          |        | 100.000 |

Exact Mass is beyond resolution capabilities of instrument

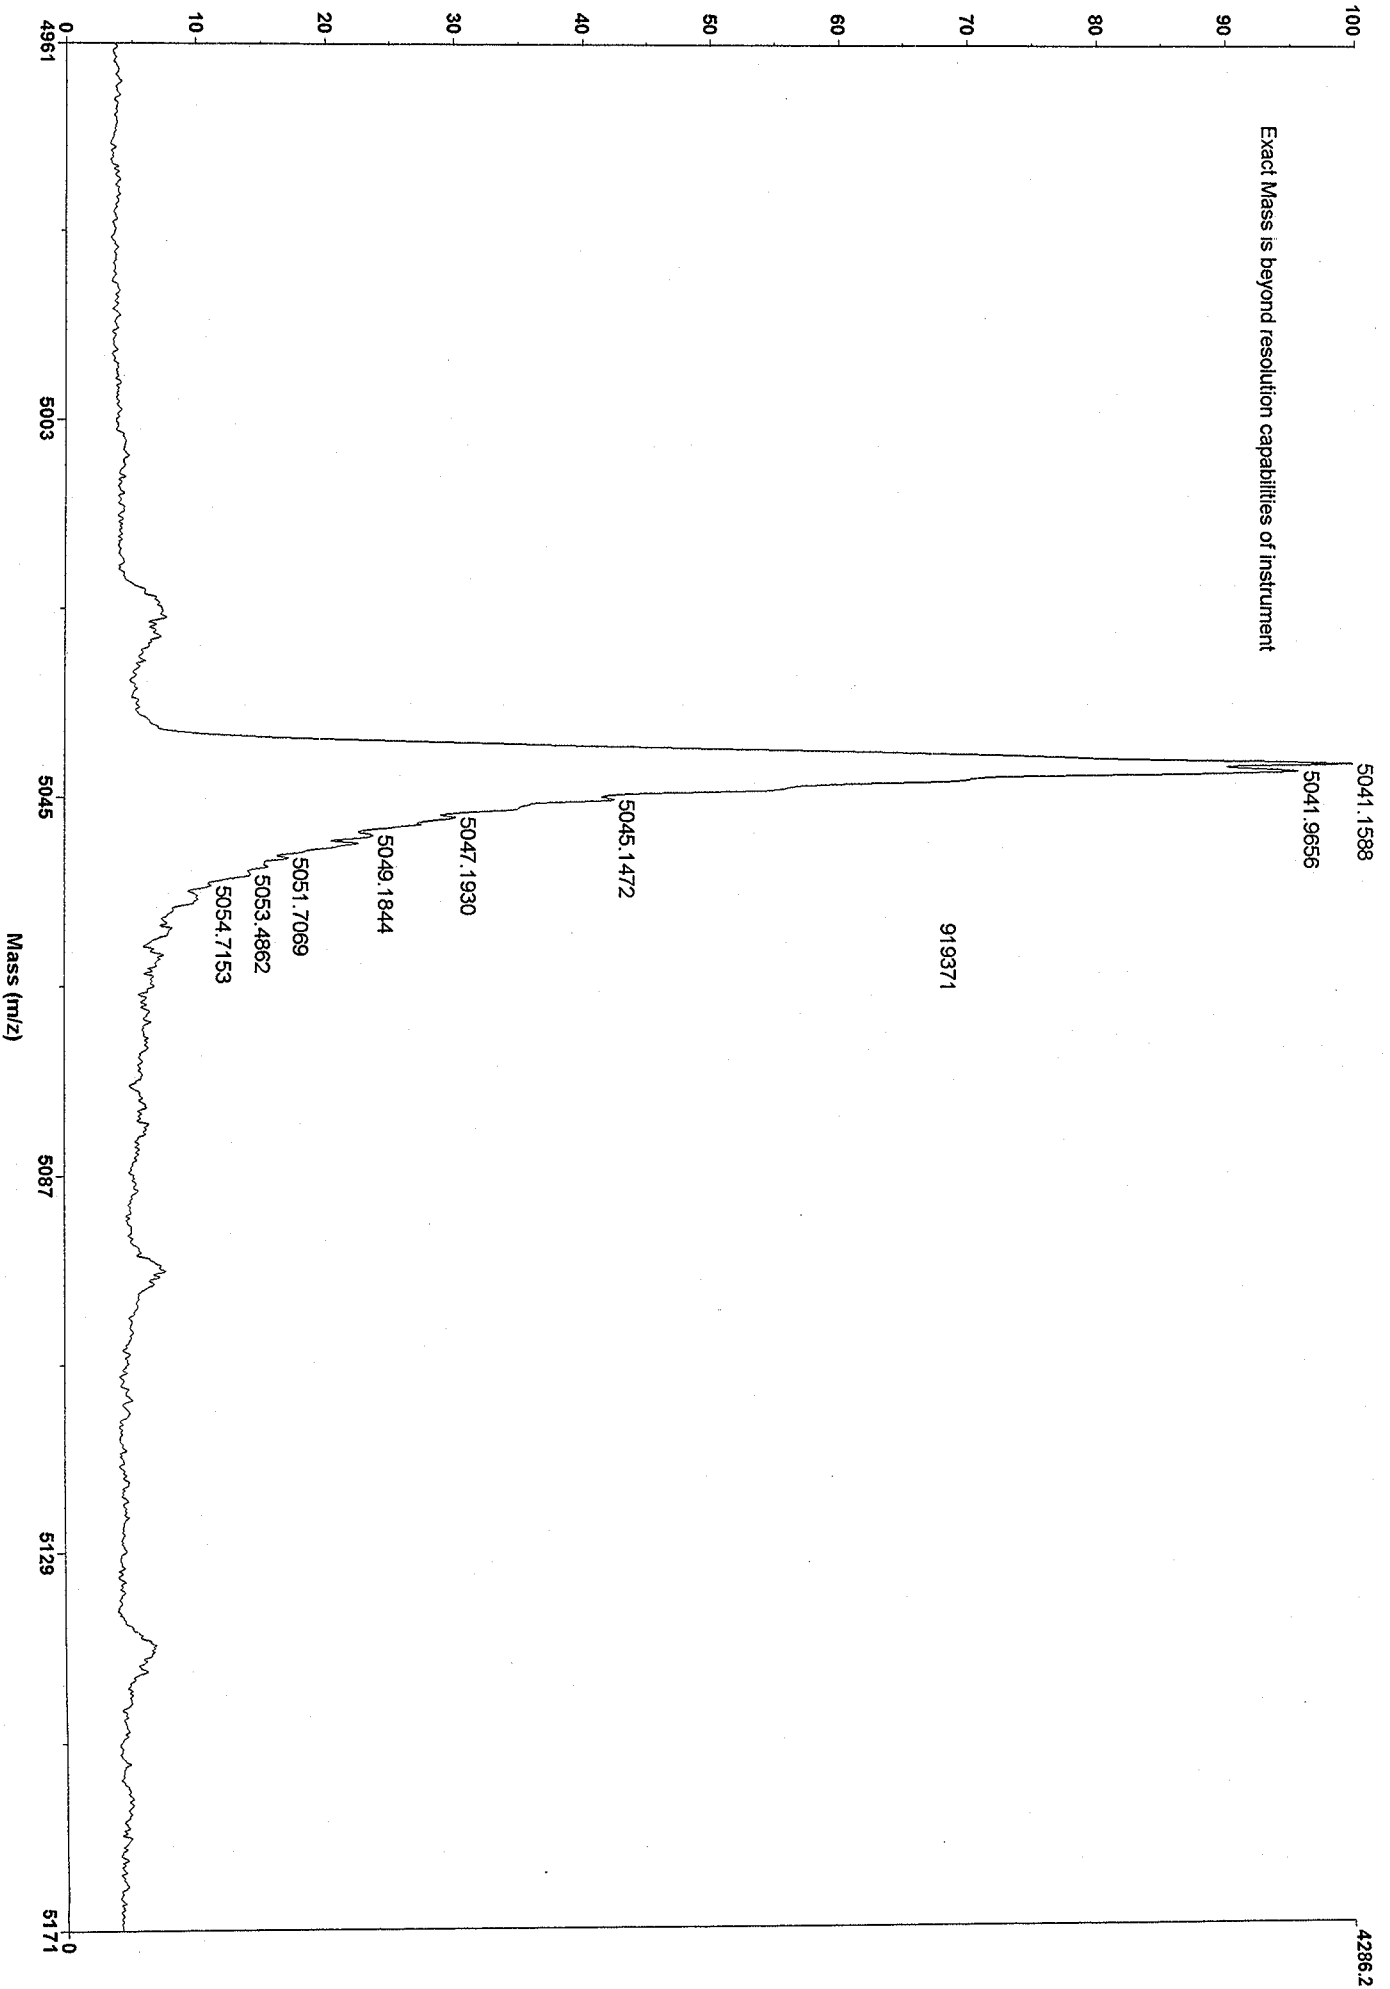

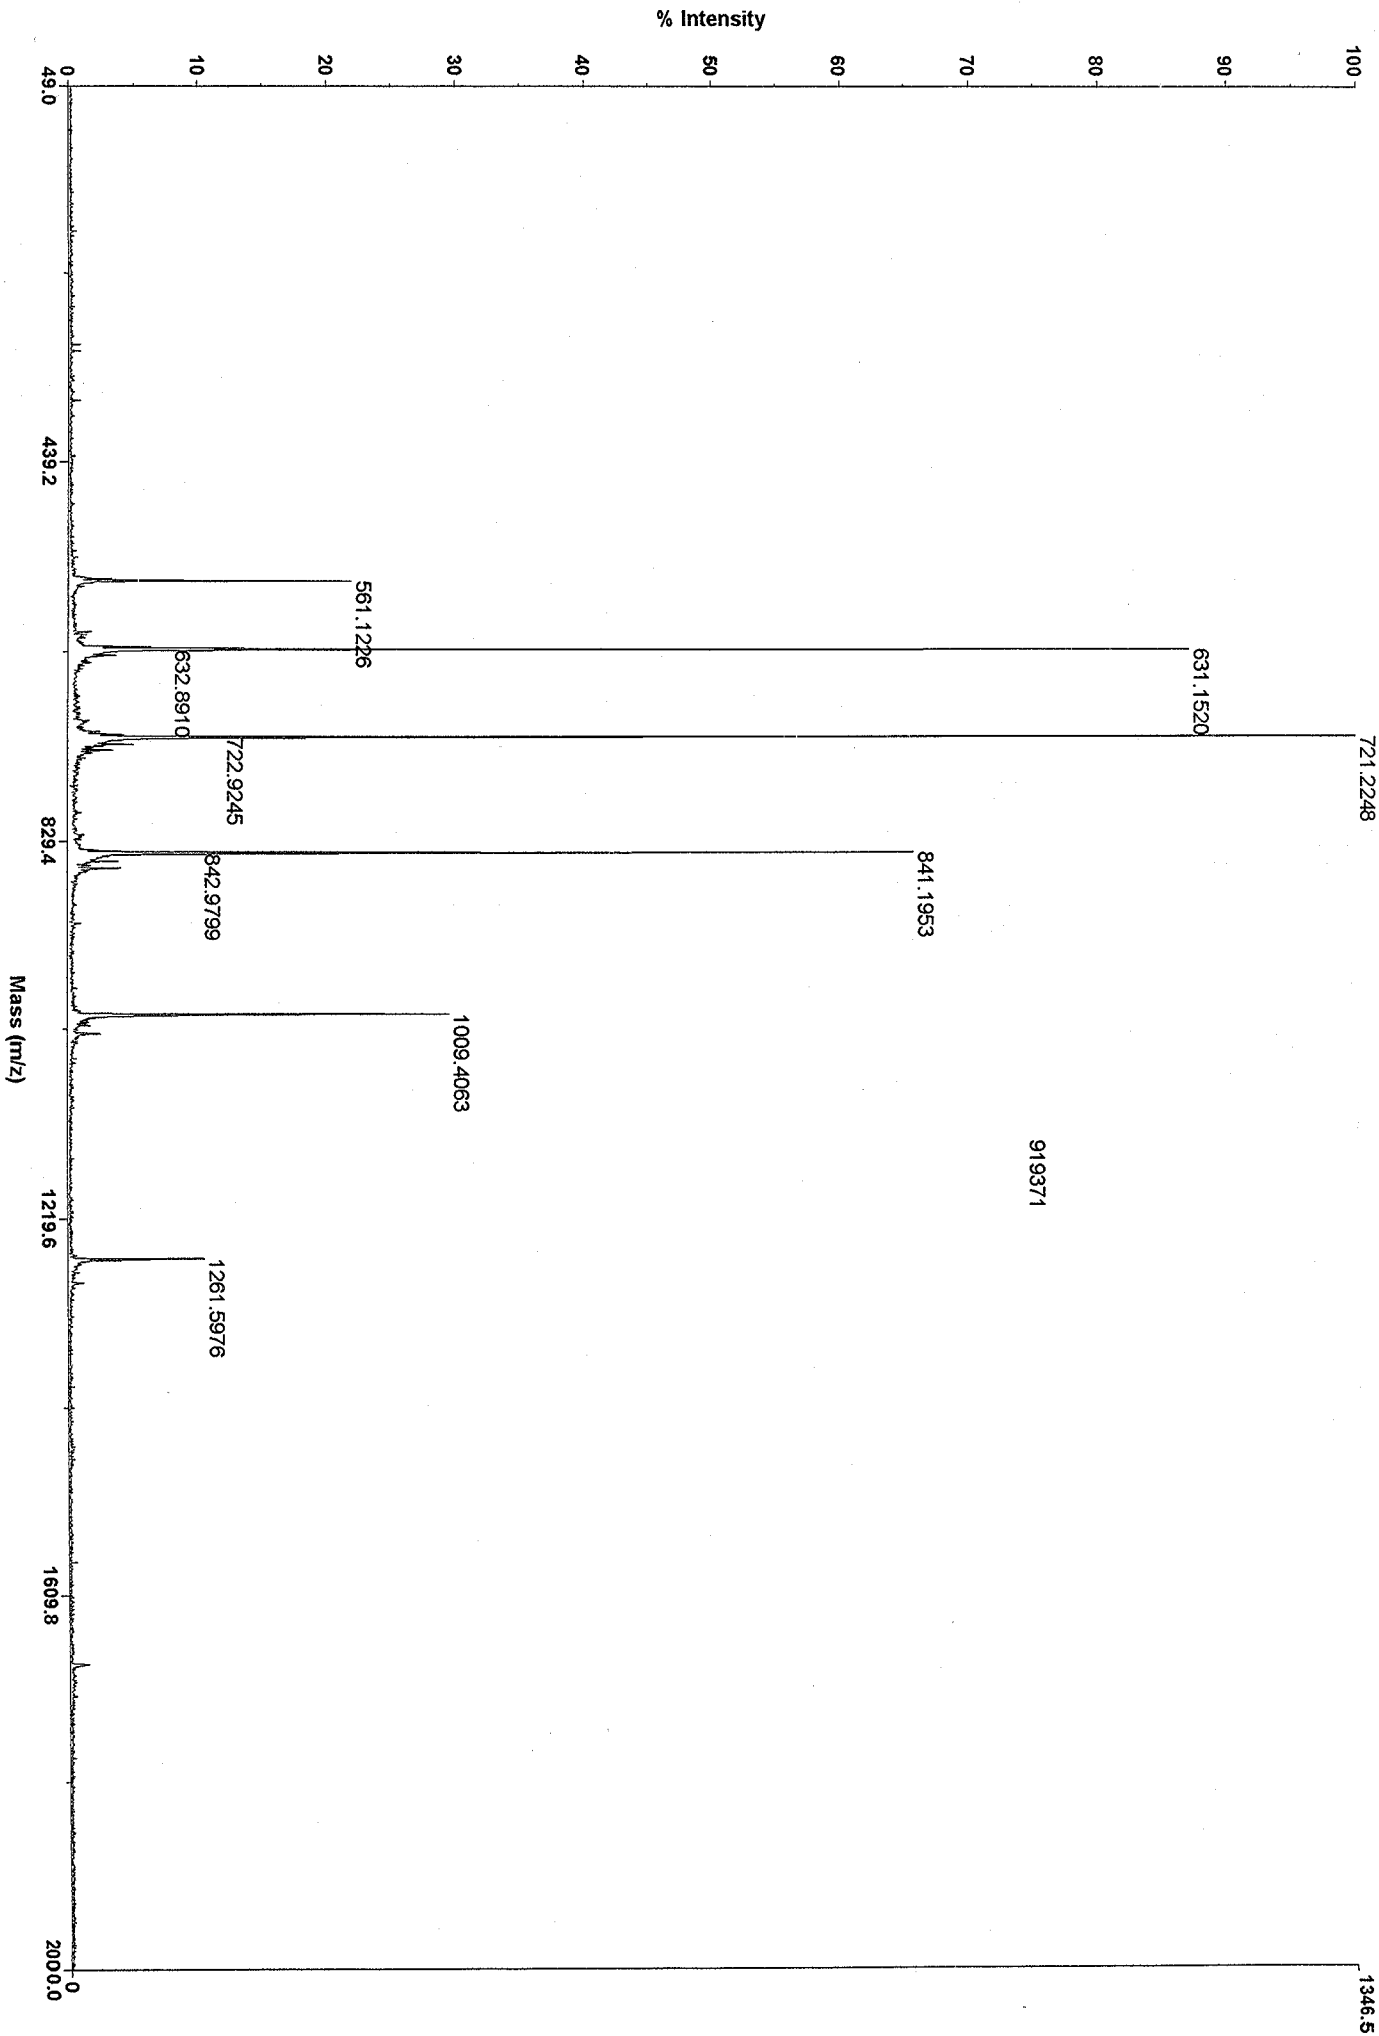

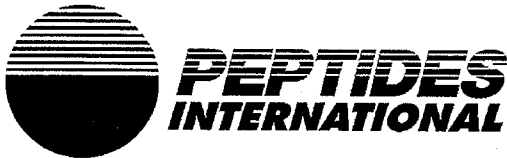

11621 Electron Drive  
Louisville, Kentucky 40299 USA  
Phone: 502-266-8787  
Fax: 502-267-1FAX (1329)  
peptides@pepnet.com  
PEPNET.COM

## ANALYTICAL DATA SHEET

Product Name: **H-RCSDSSDPLVIAANIIGILHLILWITDRLFFK  
CIYRRFKYGLK-NH<sub>2</sub>**  
H-Arg-Cys-Ser-Asp-Ser-Ser-Asp-Pro-Leu-Val-Ile-Ala-Ala-  
Asn-Ile-Ile-Gly-Ile-Leu-His-Leu-Ile-Leu-Trp-Ile-Thr-Asp-Arg-  
Leu-Phe-Phe-Lys-Cys-Ile-Tyr-Arg-Arg-Phe-Lys-Tyr-Gly-Leu-  
Lys-NH<sub>2</sub>

|             |                                                                                  |                  |         |
|-------------|----------------------------------------------------------------------------------|------------------|---------|
| Catalog No. | PCS-30391-PI                                                                     | Lot No.          | 000836C |
| Formula     | C <sub>237</sub> H <sub>377</sub> N <sub>63</sub> O <sub>56</sub> S <sub>2</sub> | Molecular Weight | 5069.16 |

Appearance White powder

|       |               |         |          |         |
|-------|---------------|---------|----------|---------|
| ES-MS | MW Calculated | 5065.80 | MW Found | 5066.65 |
|-------|---------------|---------|----------|---------|

Form Trifluoroacetate Salt

HPLC profile included (purity 96.9%)

Prepared by  
Original Date: January 12, 2011  
CM

Approved by

Sample Information

Acquired by : Admin  
 Sample Name : PCS-30391-PI  
 Sample ID : 000836C  
 Description : 0.81mg in 43uL AcOH+200uL MeCN/TFA/H2O

Vial# : 0  
 Injection Volume : 3 uL  
 Data Filename : SYS1-000836CR.lcd  
 Method Filename : gradient40\_75%.1cm  
 Date Acquired : 3/5/2012 2:04:00 PM  
 Data Processed : 3/5/2012 2:54:36 PM

Gradient: 40-75% in 35 min.  
 Column: Jupiter 5u, C18, 300A, 547029-24, (4.6mm x 250 mm)  
 Buffer: A: 0.05% TFA in H2O B: 0.05% TFA in MeCN  
 Flow: 1mL/min

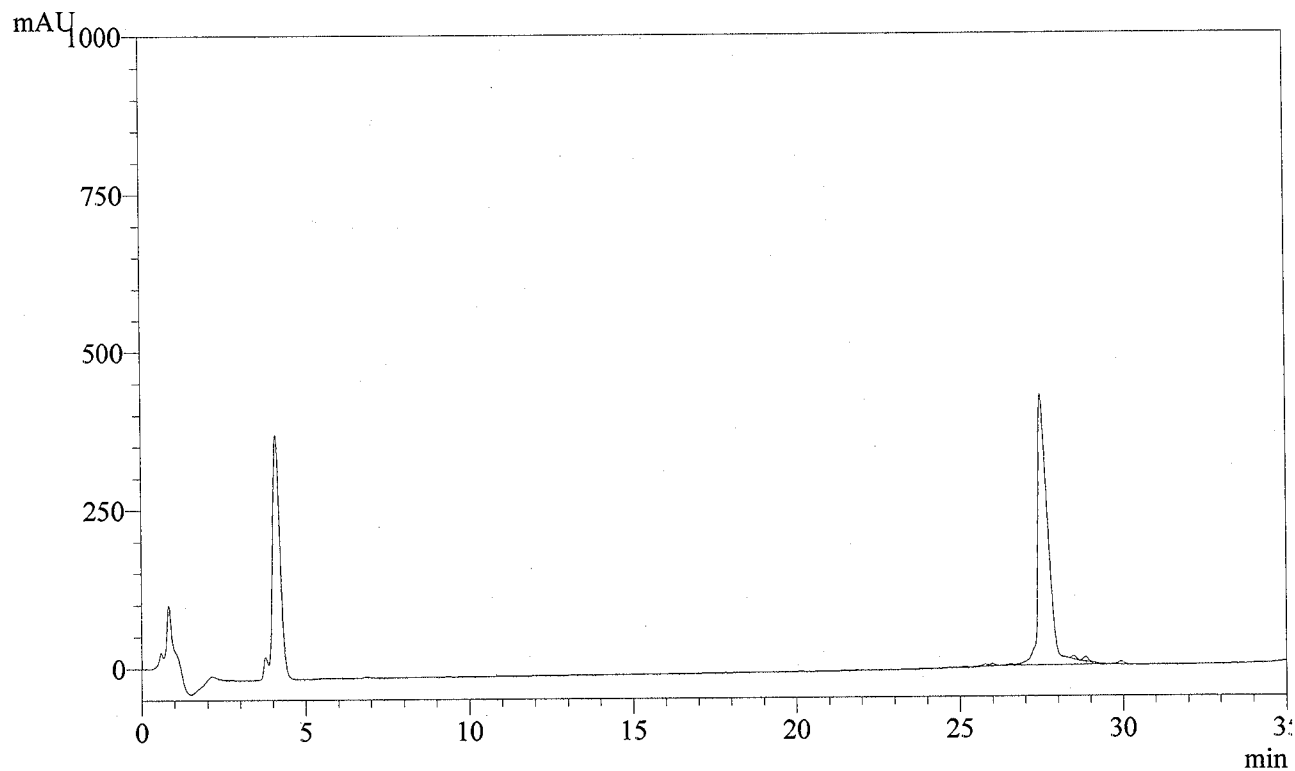

1 Det.A Ch1 / 220nm

PeakTable

Detector A Ch1 220nm

| Ret. Time | Area    | Height | Area %  |
|-----------|---------|--------|---------|
| 21.475    | 5067    | 520    | 0.052   |
| 21.835    | 6890    | 770    | 0.071   |
| 25.127    | 16181   | 1433   | 0.167   |
| 25.770    | 44106   | 3306   | 0.454   |
| 25.992    | 35997   | 3263   | 0.371   |
| 26.523    | 24861   | 1961   | 0.256   |
| 27.488    | 9401934 | 429158 | 96.884  |
| 28.476    | 44116   | 4754   | 0.455   |
| 28.841    | 68696   | 6751   | 0.708   |
| 29.937    | 56489   | 4366   | 0.582   |
|           |         |        | 100.000 |

Result: Mass Spec=>SC[BP = 5068.7, 50]

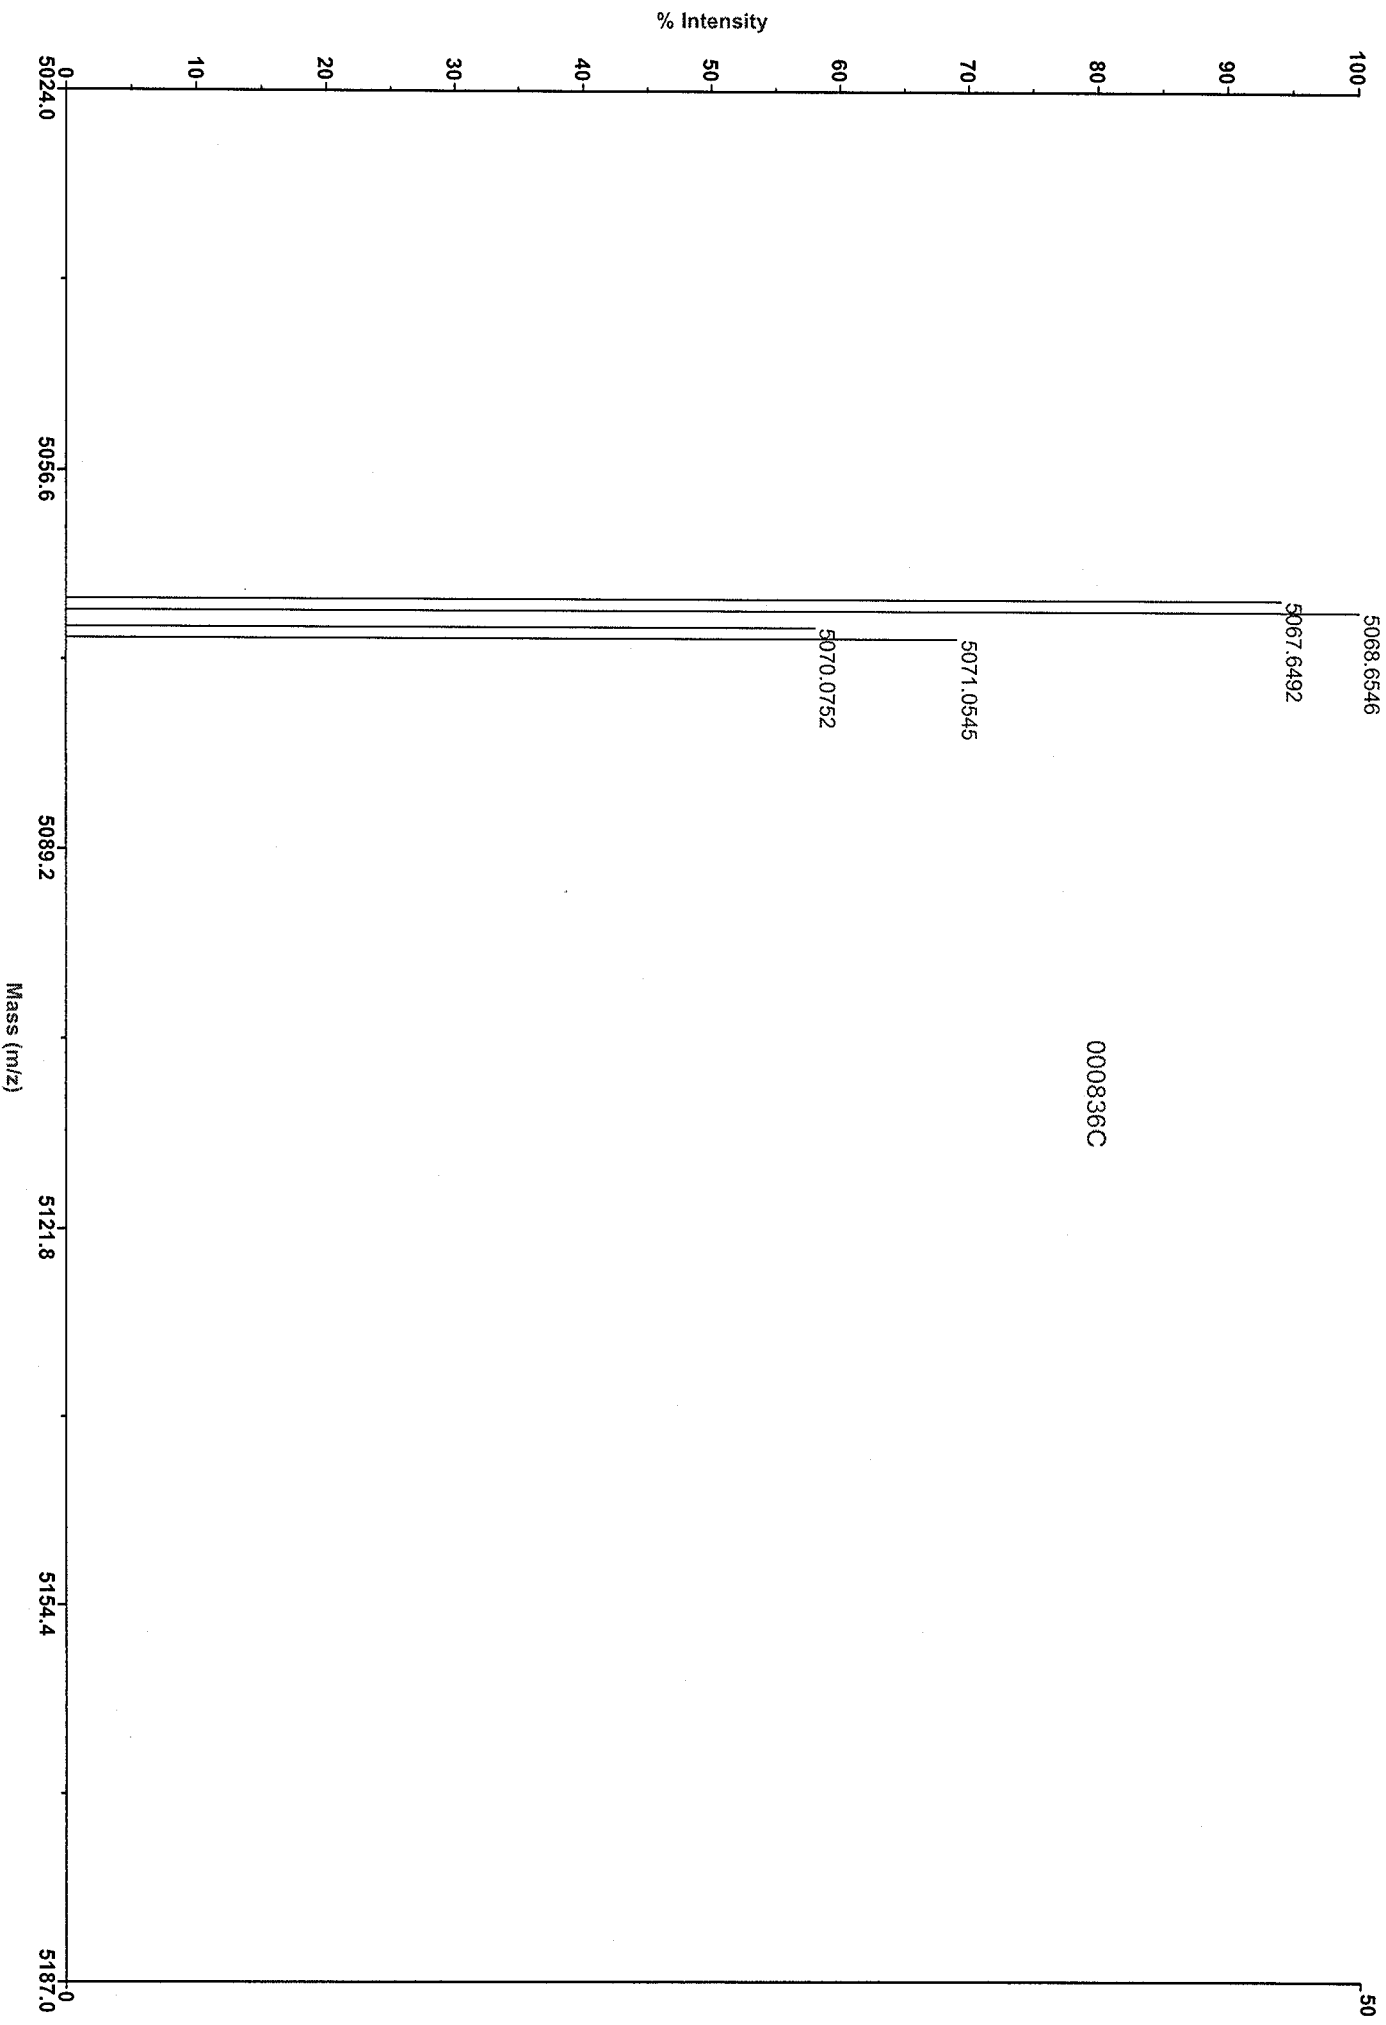

Mariner Spec #9928 [TIC = 42092, BP = 845.65, 72] from Mariner Instrument Control Panel using : C:\Mariner\Data\Factory\081511\_bic\*  
D:\... \000836C.rst  
Acquired: 14:43, March 05, 2012

Result Mass Spec [BP = 845.7, 53]

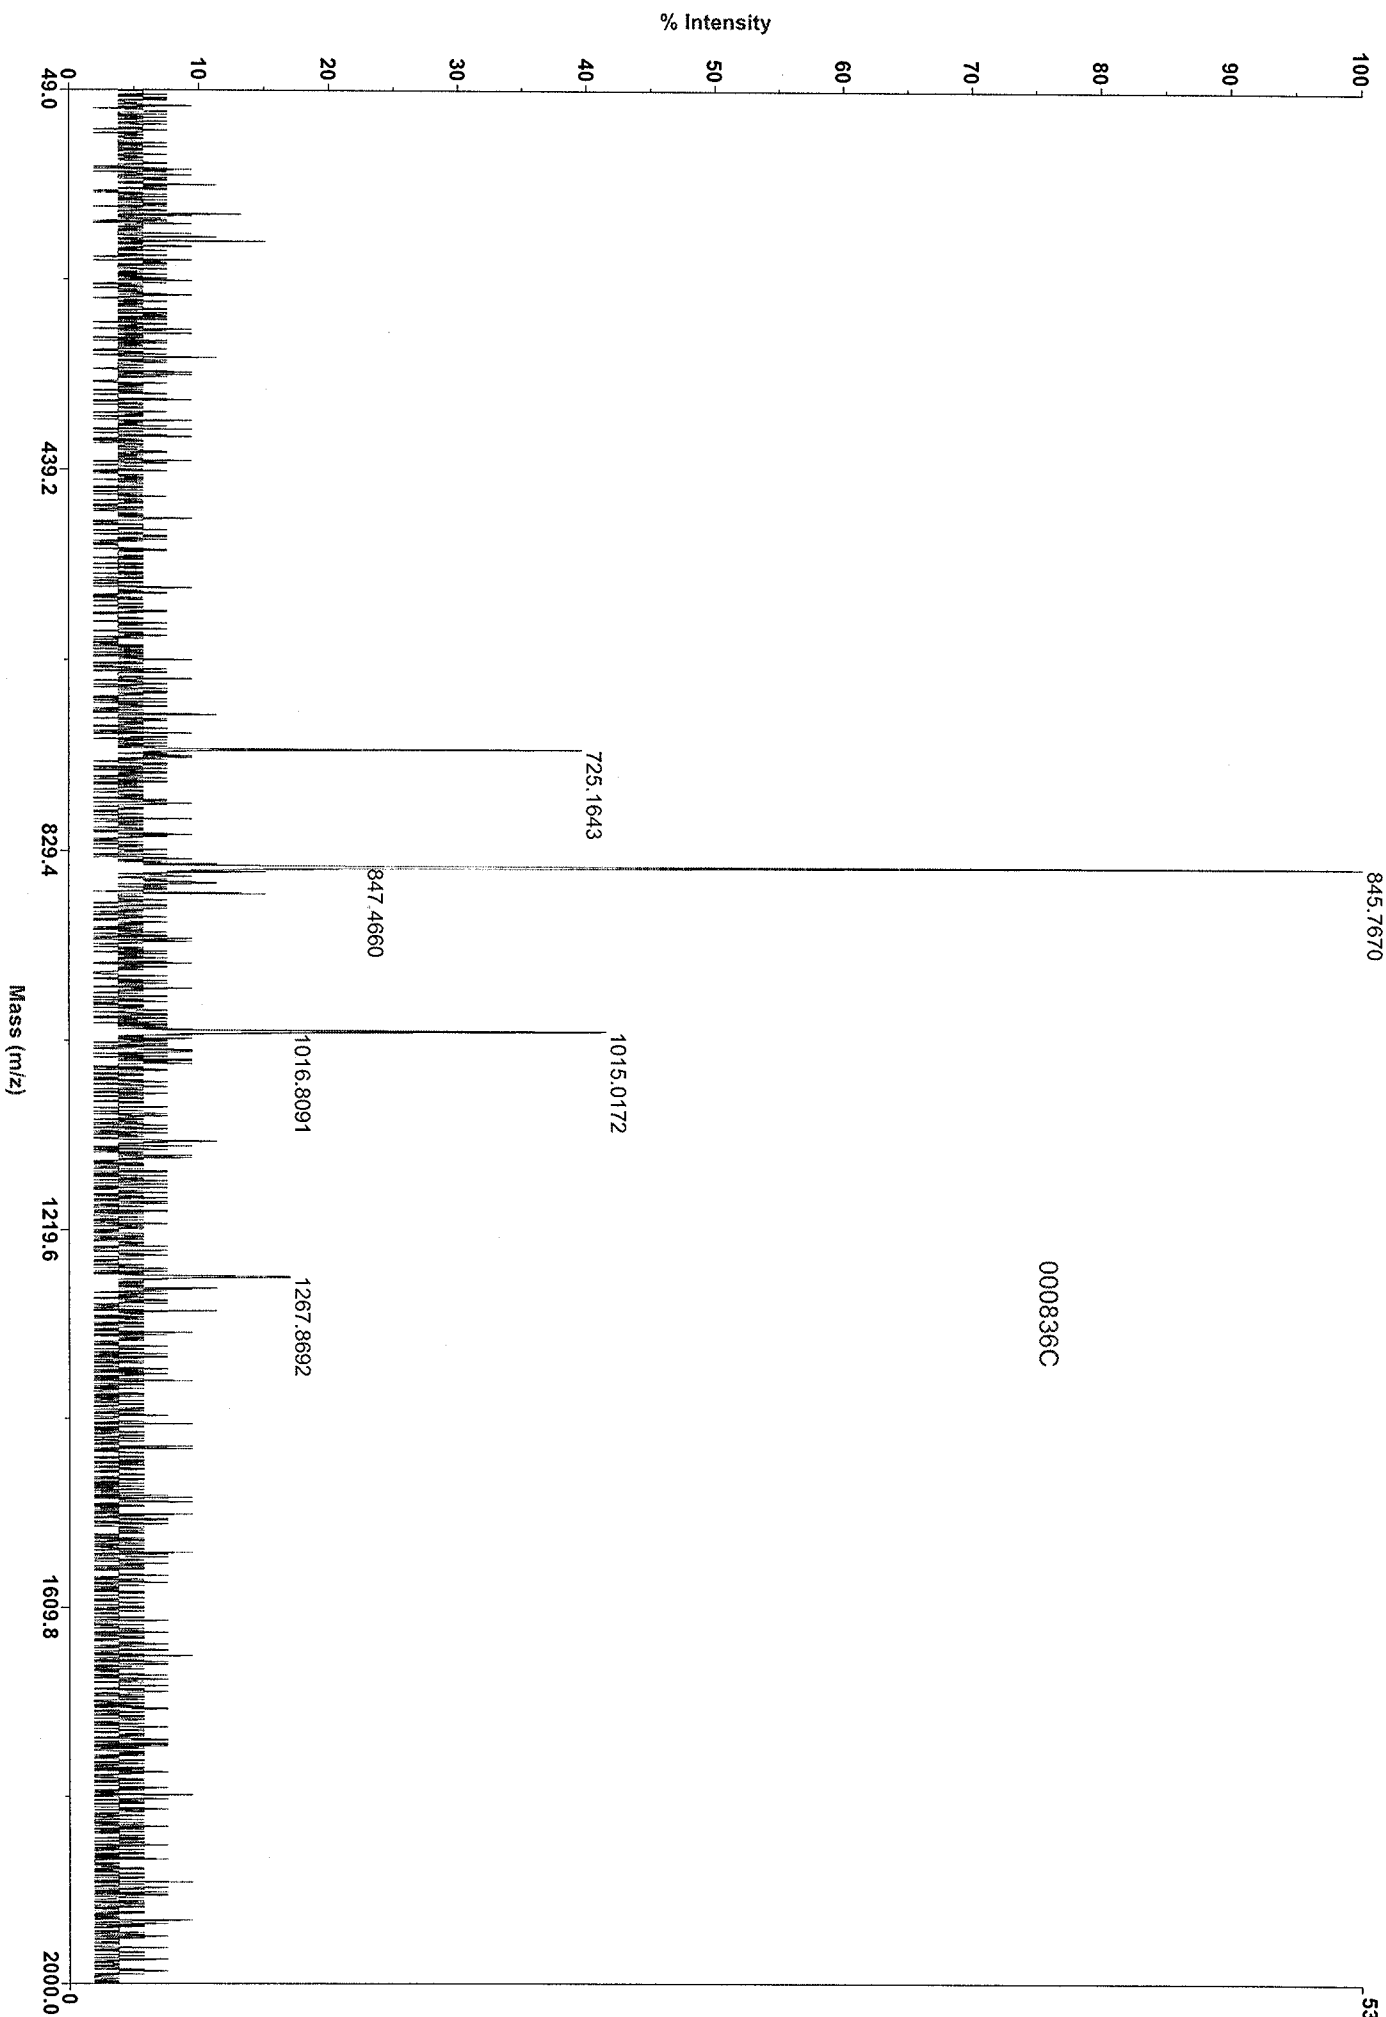

Mariner Spec #9928 [TIC = 42092, BP = 845.65, 72] from Mariner Instrument Control Panel using : C:\Mariner\Data\Factory081511.bic\*  
D:\... \000836C.rst  
Acquired: 14:43, March 05, 2012



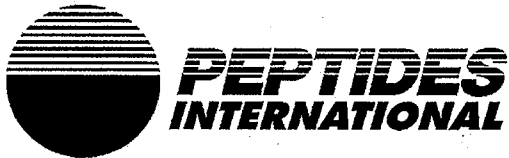

11621 Electron Drive  
Louisville, Kentucky 40299 USA  
Phone: 502-266-8787  
Fax: 502-267-1FAX (1329)  
peptides@pepnet.com  
PEPNET.COM

## ANALYTICAL DATA SHEET

**Product Name: H-RCSDSSDPLVIAANIIGILHLILWITDRL-NH<sub>2</sub>**

H-Arg-Cys-Ser-Asp-Ser-Ser-Asp-Pro-Leu-Val-Ile-Ala-Ala-  
Asn-Ile-Ile-Gly-Ile-Leu-His-Leu-Ile-Leu-Trp-Ile-Thr-Asp-  
Arg-Leu-NH<sub>2</sub>

Catalog No. PCS-31319-PI

Lot No. 001926C

Formula C<sub>145</sub>H<sub>242</sub>N<sub>40</sub>O<sub>40</sub>S

Appearance White powder

Molecular Weight Expected 3217.85      Molecular Weight Found 3219.03

Form Trifluoroacetate salt

HPLC profile included (purity 95.3%)

Prepared by:  
Manufacture Date: November 26, 2013  
CM

  
Approved by

Sample Information

Acquired by : Admin  
 Catalog Number : PCS-31319-PI  
 Sample ID : 001926C  
 Description : 0.31mg in 7uL AcOH+55uL MeCN/TFA/H2O DEGASSED

Injection Volume : 3 uL  
 Data Filename : SYS1-001926C.lcd  
 Method Filename : gradient 20\_80in30min.lcm  
 Report Filename : reportformat20\_80in30min.lcr  
 Date Acquired : 11/26/2013 7:11:01 PM  
 Data Processed : 11/26/2013 7:46:34 PM

Gradient: 20-80% in 30 min.  
 Column: Jupiter 5u, C18, 300A, 547029-24, (4.6mm x 250 mm)  
 Buffer: A: 0.05% TFA in H2O B: 0.05% TFA in MeCN  
 Flow: 1mL/min  
 Instrument ID: SHIMADZU 1

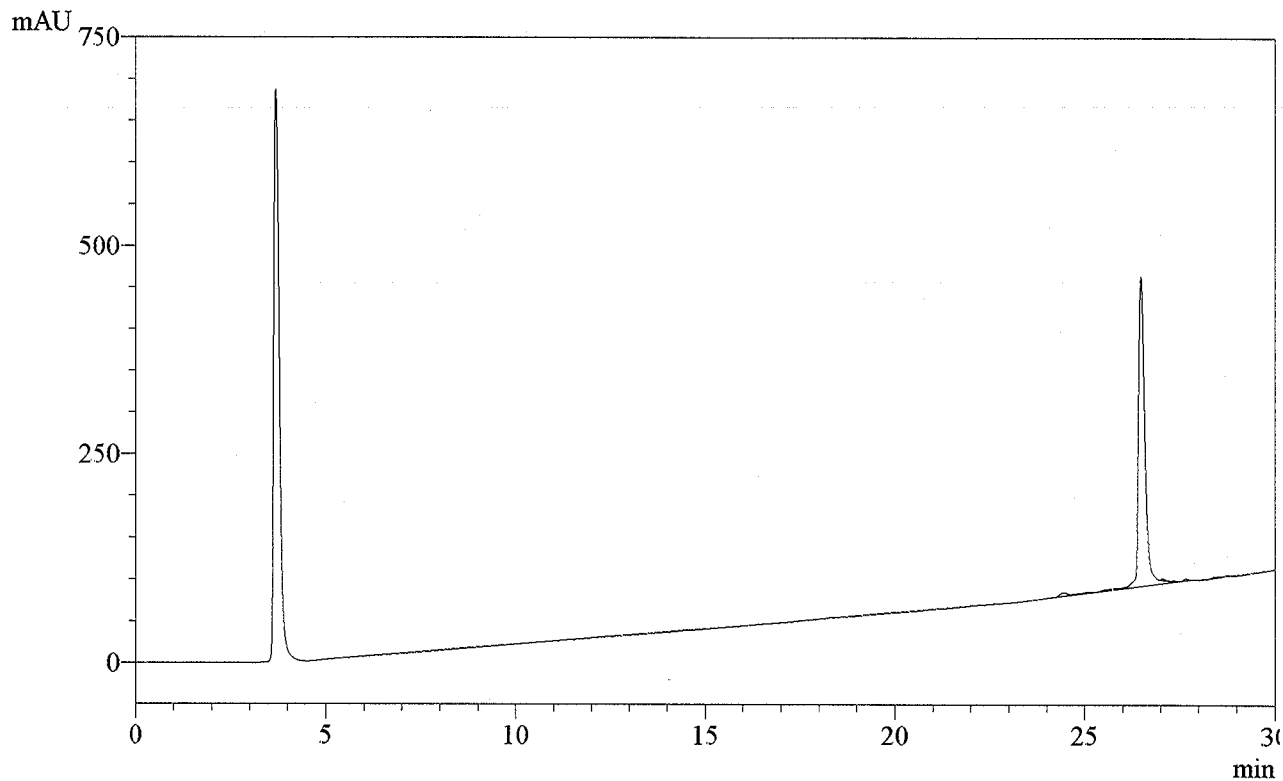

1 Det.A Ch1 / 220nm

PeakTable

Detector A Ch1 220nm

| Ret. Time | Area    | Height | Area %  |
|-----------|---------|--------|---------|
| 24.455    | 140503  | 4262   | 3.060   |
| 26.485    | 4374953 | 371201 | 95.284  |
| 27.051    | 11522   | 1668   | 0.251   |
| 27.340    | 2947    | 523    | 0.064   |
| 27.660    | 16496   | 2147   | 0.359   |
| 28.125    | 1030    | 165    | 0.022   |
| 28.750    | 44055   | 2041   | 0.959   |
|           |         |        | 100.000 |
